# Supplementary material for: Topographic and vegetation controls of the spatial distribution of snow depth in agro-forested environments by UAV lidar
Source: Copernicus journal article supplement (doi:10.5194/tc-17-1225-2023), 2023-03-14
Supplement: Supplementary file 1 [file tc-17-1225-2023-supplement.pdf]

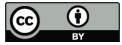

*Supplement of*

## **Topographic and vegetation controls of the spatial distribution of snow depth in agro-forested environments by UAV lidar**

**Vasana Dharmadasa et al.**

*Correspondence to:* Vasana Dharmadasa ([vasana.sandamali.dharmadasa@uqtr.ca](mailto:vasana.sandamali.dharmadasa@uqtr.ca))

The copyright of individual parts of the supplement might differ from the article licence.

## Supplement

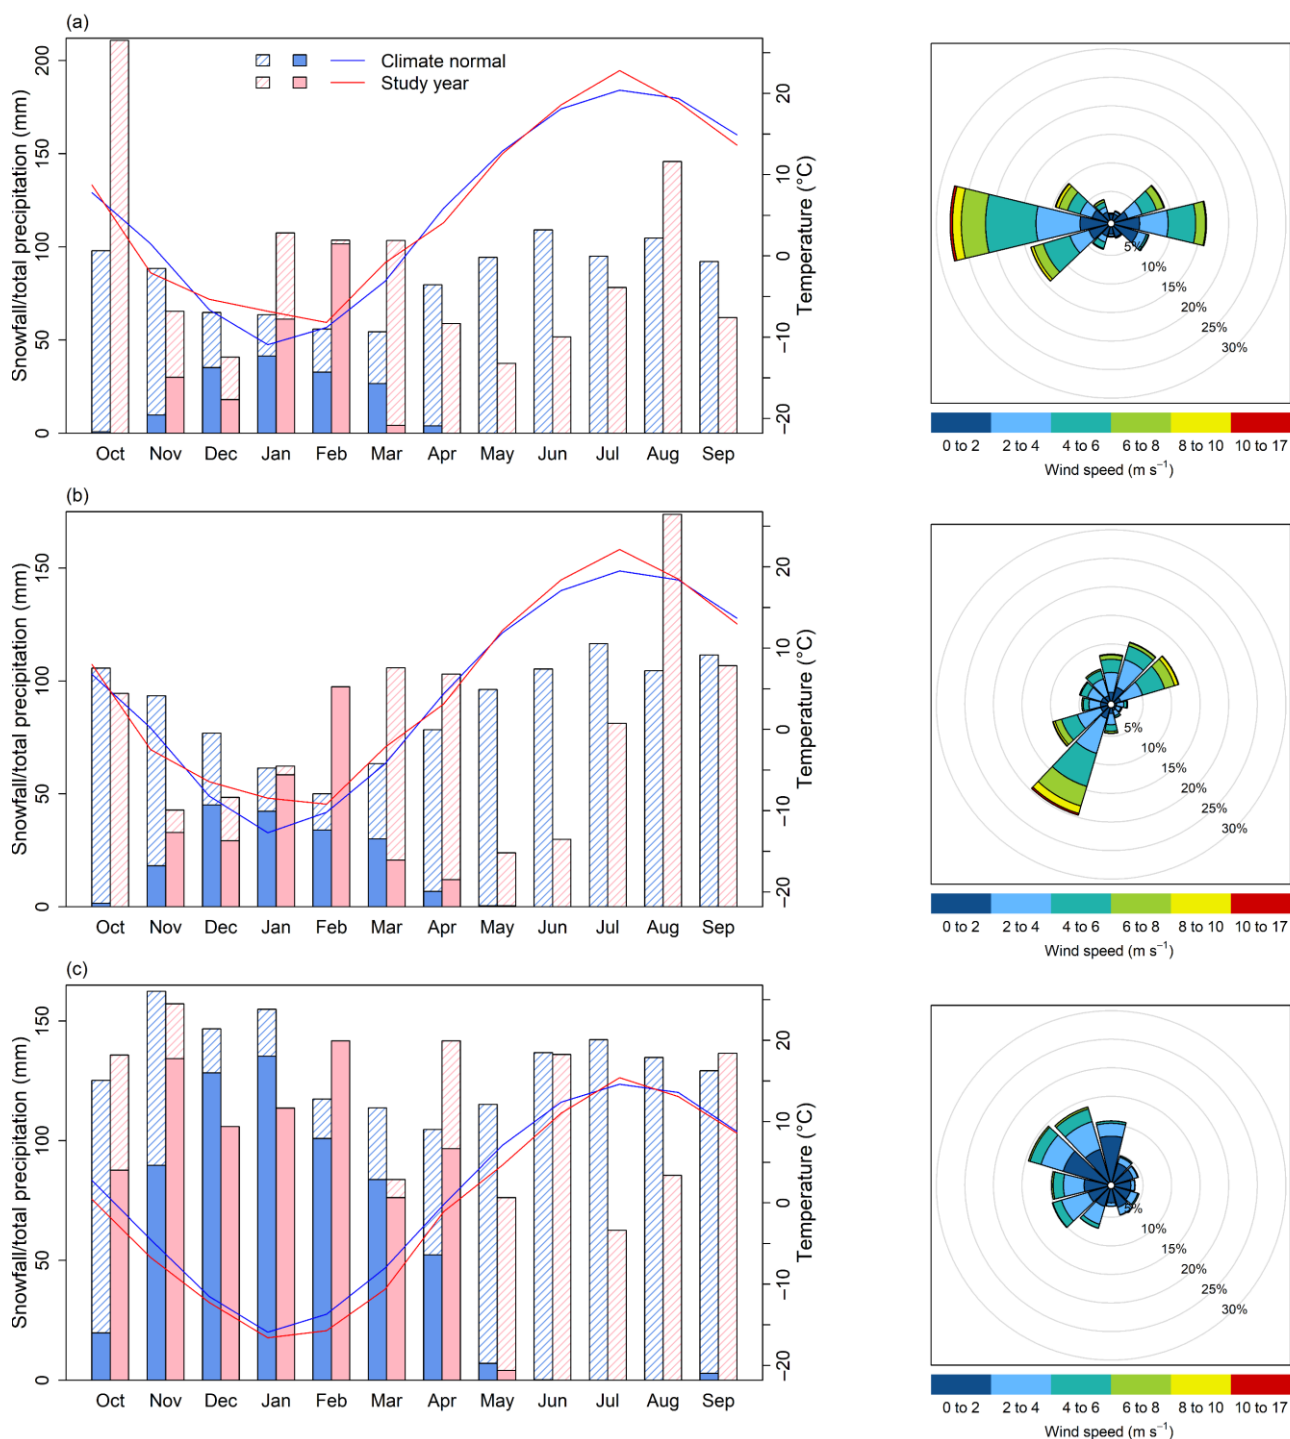

**Figure S1.** Long-term snowfall/total precipitation, average temperature, and wind rose plots at (a) Sainte-Marthe, (b) Saint-Maurice and (c) Montmorency. Stripped bars indicate total precipitation and solid color bars indicate snowfall. Long-term snowfall, total precipitation and

- 5 average temperatures were derived from climate normal (averages for 1981–2010) for the same ECCC stations used in Table 1. Then they were plotted with snowfall/total precipitation and average temperature values of the study hydrological years (Oct–Sept) to place them in a climatological context. The long-term wind rose plots were derived from the nearest available wind stations to the sites for 2010–2020 (Station climate ID 7016470, 7018561, and 7042395 for Sainte-Marthe, Saint-Maurice, and Montmorency)

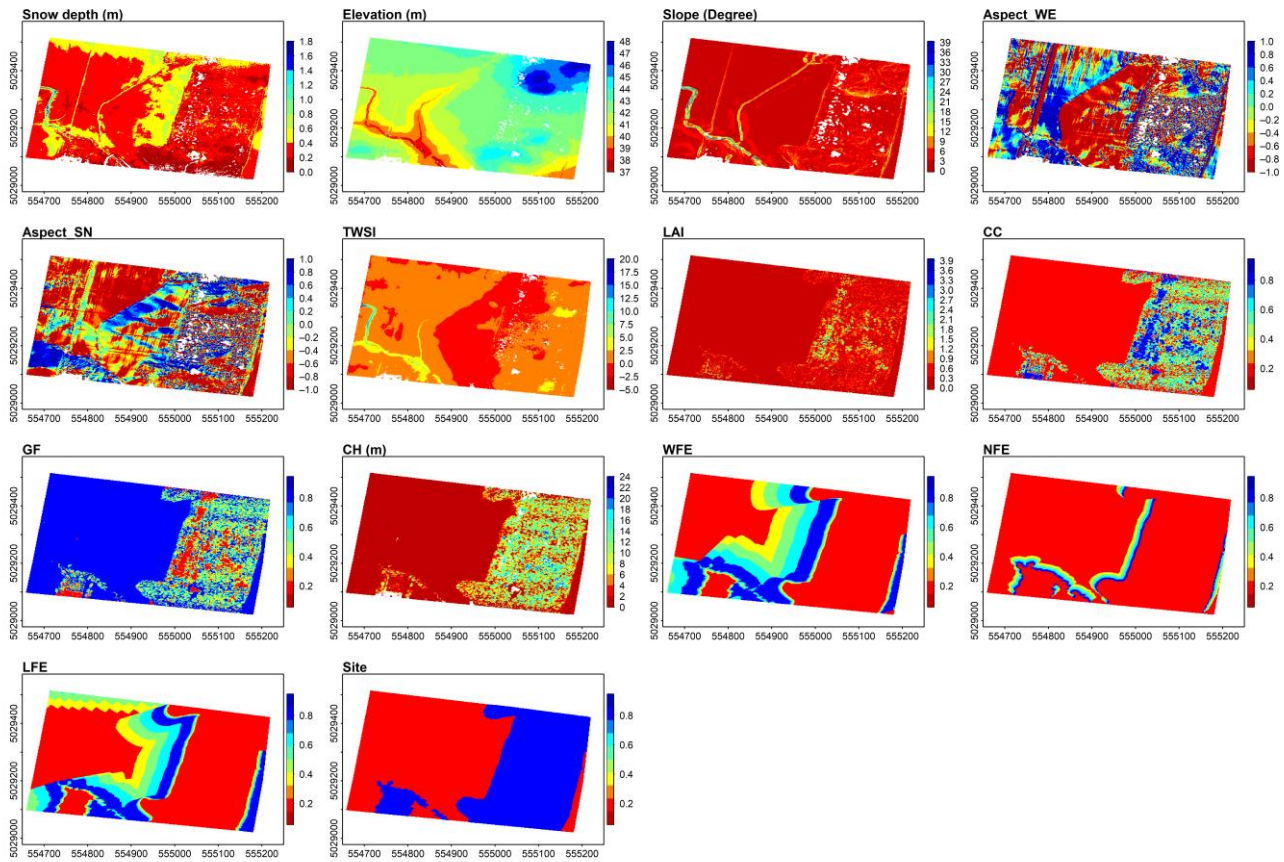

10

**Figure S2.** Sainte-Marthe snow depth and predictor variables maps. The elevation is presented as ellipsoidal height.

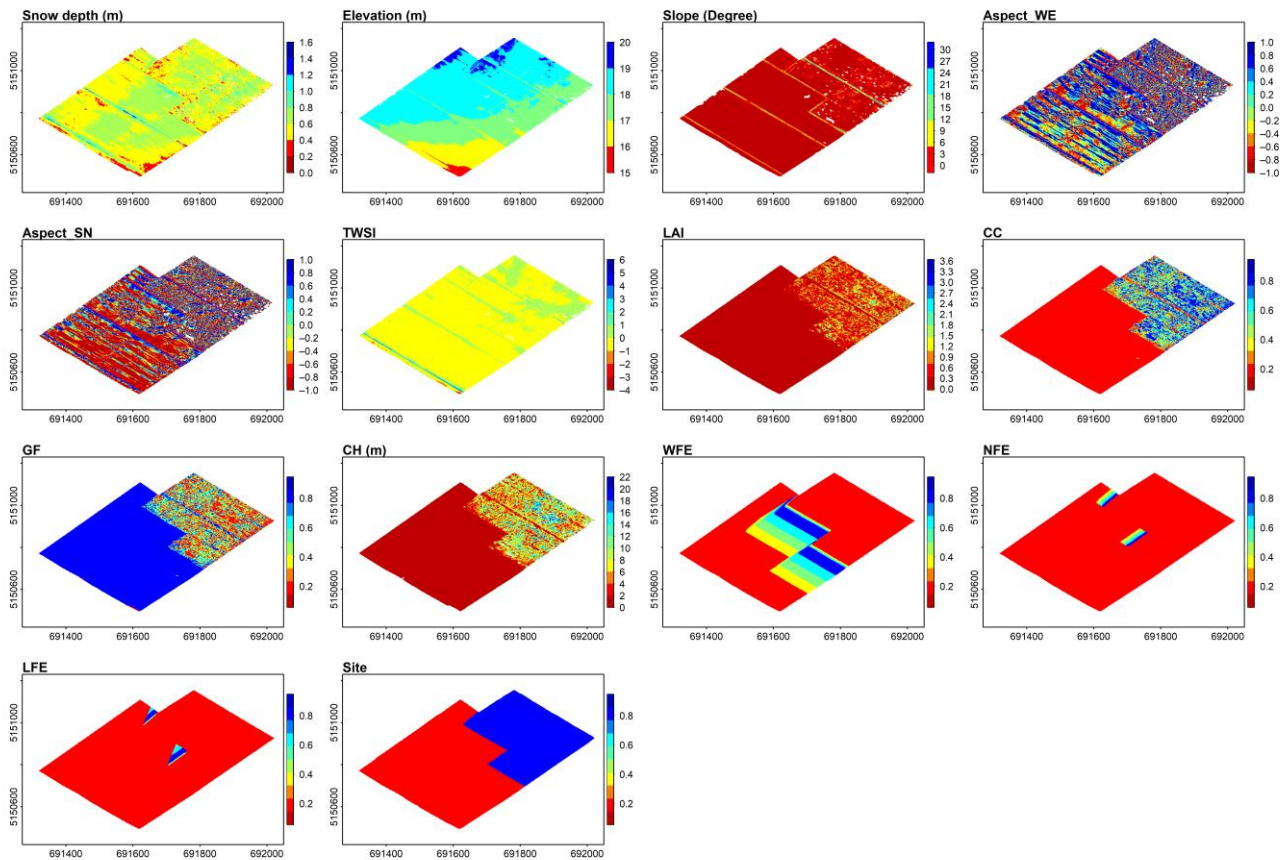

**Figure S3.** Saint-Maurice snow depth and predictor variables maps. The elevation is presented as ellipsoidal height.

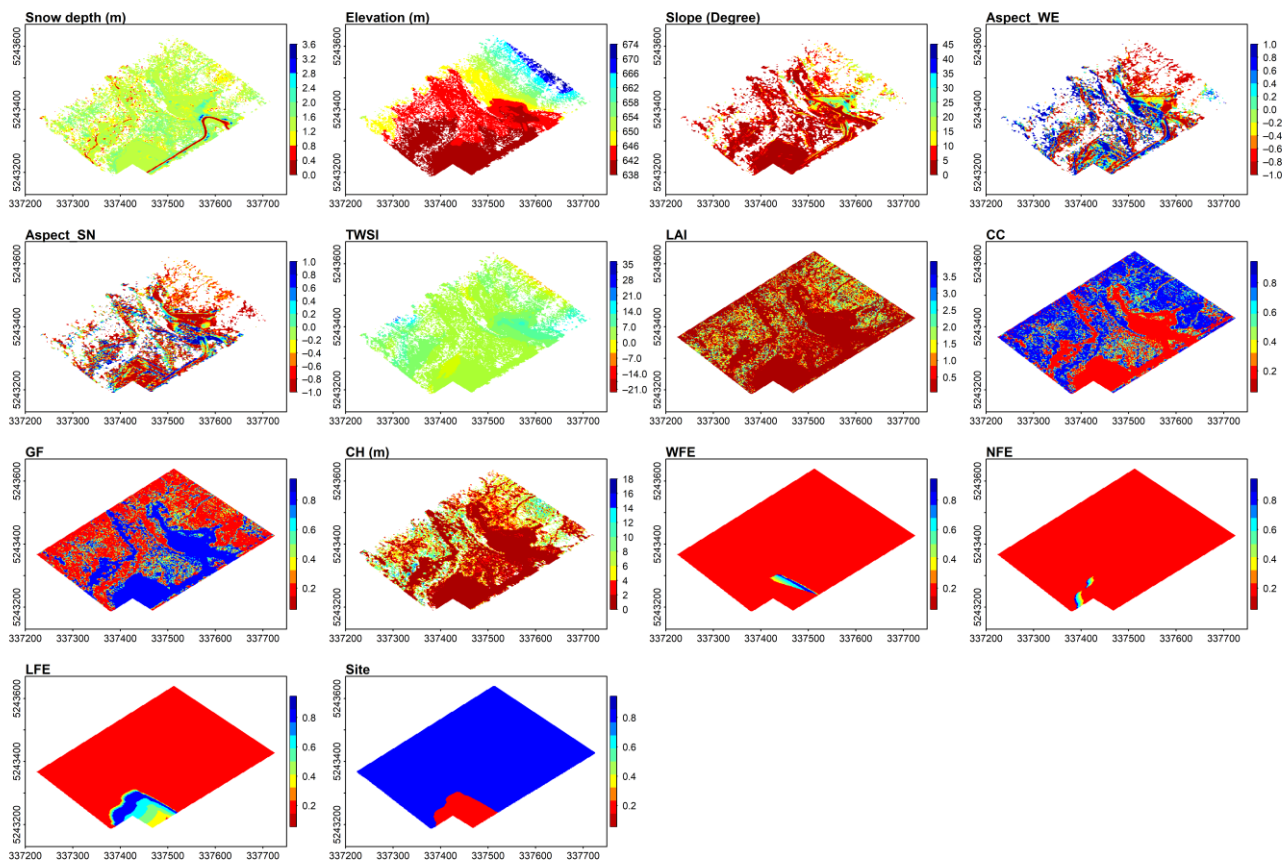

15

**Figure S4.** Montmorency snow depth and predictor variables maps. The elevation is presented as ellipsoidal height.

**Table S1.** RF model  $R^2$  for different vegetation descriptors

|     | Sainte-Marthe |        |       | Saint-Maurice |        |       | Montmorency  |        |       |
|-----|---------------|--------|-------|---------------|--------|-------|--------------|--------|-------|
|     | Field+Forest  | Forest | Field | Field+Forest  | Forest | Field | Field+Forest | Forest | Field |
| LAI | 0.659         | 0.291  | 0.778 | 0.459         | 0.168  | 0.602 | 0.303        | 0.290  | 0.560 |
| CC  | 0.659         | 0.292  | 0.778 | 0.459         | 0.167  | 0.602 | 0.304        | 0.294  | 0.562 |
| CH  | 0.672         | 0.287  | 0.799 | 0.498         | 0.155  | 0.664 | 0.369        | 0.365  | 0.589 |
| GF  | 0.659         | 0.290  | 0.777 | 0.459         | 0.166  | 0.602 | 0.304        | 0.292  | 0.563 |

Note: sensitivity of different vegetation descriptors was tested by keeping the other variables in RF models unchanged.

20
